# Supplementary material for: Functional Characterization of the Nep1-Like Protein Effectors of the Necrotrophic Pathogen – Alternaria brassicae
Source: Front Microbiol. 2021 Oct 26;12:738617. doi: 10.3389/fmicb.2021.738617 (PMC8576325; doi:10.3389/fmicb.2021.738617)
Supplement: Supplementary file 1 [file Table_1.XLSX]

## Sheet: Sheet1
Supplementary Table S1: List of Ascomycetes used for the phylogenetic tree construction and their nutrition-based lifestyles
S.No.	Protein ID	Organism	Lifestyle	Label on Tree
1	A0A177D5C5	Alternaria alternata	Saprophyte	ALTA1
2	A0A177DU97	Alternaria alternata	Saprophyte	ALTA1
3	W6XLX3	Cochliobolus carbonum	Necrotroph	COCCA
4	W6YAG2	Cochliobolus carbonum	Necrotroph	COCCA
5	M2U3W7	Cochliobolus heterostrophus	Necrotroph	COCH
6	M2RB34	Cochliobolus sativus	Hemibiotroph	COCSN
7	M2TE75	Cochliobolus sativus	Hemibiotroph	COCSN
8	E4ZH25	Leptosphaeria maculans	Hemibiotroph	LEPMJ
9	E4ZJ62	Leptosphaeria maculans	Hemibiotroph	LEPMJ
10	K2QPU6	Macrophomina phaseolina	Necrotroph	MACPH
11	K2RCQ0	Macrophomina phaseolina	Necrotroph	MACPH
12	K2RIA3	Macrophomina phaseolina	Necrotroph	MACPH
13	K2RNB9	Macrophomina phaseolina	Necrotroph	MACPH
14	Q0UEB9	Phaeosphaeria nodorum	Necrotroph	PHANO
15	E3RXI6	Pyrenophora teres f. teres	Necrotroph	PYTT
16	B2WKT1	Pyrenophora tritici-repentis	Necrotroph	PYTTR
17	R0K0L5	Setosphaeria turcica	Necrotroph	SETTU
18	A0A178AW52	Stagonospora sp.	Necrotroph	9STA
19	A0A0F4GQ76	Zymoseptoria brevis	Hemibiotroph	ZYMBR
20	F9XQ56	Zymoseptoria tritici	Hemibiotroph	ZYMTR
21	A0A1X7S934	Zymoseptoria tritici	Hemibiotroph	ZYMTR
22	M7TEI1	Botryotinia fuckeliana	Necrotroph	BOTF1
23	M7UBE0	Botryotinia fuckeliana	Necrotroph	BOTF2
24	G2XQ82	Botryotinia fuckeliana	Necrotroph	BOTF3
25	G2XR95	Botryotinia fuckeliana	Necrotroph	BOTF4
26	W9CFW8	Sclerotinia borealis	Necrotroph	SCLBF
27	A7ECP1	Sclerotinia sclerotiorum	Necrotroph	SCLBF
28	A7F3R6	Sclerotinia sclerotiorum	Necrotroph	SCLS1
29	M1VXN8	Claviceps purpurea	Biotroph	CLAP2
30	T0JMK5	Colletotrichum gloeosporioides	Hemibiotroph	COLGP
31	T0LXJ9	Colletotrichum gloeosporioides	Hemibiotroph	COLGP
32	E3QWC1	Colletotrichum graminicola	Hemibiotroph	COLGM
33	E3R011	Colletotrichum graminicola	Hemibiotroph	COLGM
34	H1VAU5	Colletotrichum higginsianum	Hemibiotroph	COLHI
35	H1VSJ9	Colletotrichum higginsianum	Hemibiotroph	COLHI
36	H1W2L5	Colletotrichum higginsianum	Hemibiotroph	COLHI
37	F9F3L8	Fusarium oxysporum	Hemibiotroph	FUOX
38	F9F530	Fusarium oxysporum	Hemibiotroph	FUOX
39	G4MKE7	Magnaporthe oryzae	Hemibiotroph	MAGO7
40	G4NA85	Magnaporthe oryzae	Hemibiotroph	MAGO7
41	A0A194W8B4	Valsa mali	Necrotroph	VALML
42	A0A194W900	Valsa mali	Necrotroph	VALML
43	A0A194WDK1	Valsa mali	Necrotroph	VALML
44	C9SAK2	Verticillium alfalfae	Hemibiotroph	VERA1
45	C9SKL6	Verticillium alfalfae	Hemibiotroph	VERA1
46	C9SXG4	Verticillium alfalfae	Hemibiotroph	VERA1
47	G2WWK9	Verticillium dahliae	Hemibiotroph	VERDV
48	G2X349	Verticillium dahliae	Hemibiotroph	VERDV
49	G2X3W4	Verticillium dahliae	Hemibiotroph	VERDV
50	G2XA90	Verticillium dahliae	Hemibiotroph	VERDV
51	A0A0G4KJM8	Verticillium longisporum	Hemibiotroph	VERL
52	A0A0G4LMN5	Verticillium longisporum	Hemibiotroph	VERL
53	A0A0G4LZM9	Verticillium longisporum	Hemibiotroph	VERL
54	ABRSC02.949	Alternaria brassicae	Necrotroph	ABR
55	ABRSC02.1105	Alternaria brassicae	Necrotroph	ABR
56	Abrc01	Alternaria brassicicola	Necrotroph	ABRC
57	Abrc02	Alternaria brassicicola	Necrotroph	ABRC
