# Supplementary material for: Functional Characterization of the Nep1-Like Protein Effectors of the Necrotrophic Pathogen – Alternaria brassicae
Source: Front Microbiol. 2021 Oct 26;12:738617. doi: 10.3389/fmicb.2021.738617 (PMC8576325; doi:10.3389/fmicb.2021.738617)
Supplement: Supplementary file 2 [file Table_2.XLSX]

## Sheet: Sheet1
Supplementary Table S2: List of primers used in the study and their sequences
S.No	Name	Sequence
1	AB_qpcr_Act_FP	CATTGTCATGTCTGGTGGTA
2	AB_qpcr_Act_RP	CTCTCGTCGTACTCCTGCTT
3	AB_qpcr_NLP1_FP	CAACACCAGTGGAGGTCT
4	AB_qpcr_NLP1_RP	CTACGACATTGCCAGCG
5	AB_qpcr_NLP2_FP	CATAGGTTACAGATCCATCTTCC
6	AB_qpcr_NLP2_RP	CTAAGGTAGCTTTCAAAGTTGC
7	AbrNLP2_pENTR_FP	caccATGGTCAACTTCGCCCTTC
8	AbrNLP2_pENTR_RP	GATGAAAGCTTCGCTAAGGTAG
9	AbrNLP1_pENTR_FP	caccATGCATTTCTCTACGATCC
10	AbrNLP1_pENTR_RP	GATAGCAGCCTTGTCTAAG
