# Supplementary material for: Functional Characterization of the Nep1-Like Protein Effectors of the Necrotrophic Pathogen – Alternaria brassicae
Source: Front Microbiol. 2021 Oct 26;12:738617. doi: 10.3389/fmicb.2021.738617 (PMC8576325; doi:10.3389/fmicb.2021.738617)
Supplement: Supplementary file 3 [file Table_3.XLSX]

## Sheet: Sheet1
Supplementary Table S3: List of Alternaria species, number of NLPs, and their nutrition-based lifestyle
S.No.	Organism	Strain	No. of NLPs	Lifestyle	Reference
1	Alternaria alternata	SRC1lrK2f	2	Saprophyte	https://mycocosm.jgi.doe.gov/Altal1/Altal1.home.html
2	Alternaria alternata	PN2	2	Saprophyte	Rajarammohan et al., 2019; https://doi.org/10.1186/s12864-019-6414-6
3	Alternaria alternata	PN1	2	Saprophyte	Rajarammohan et al., 2019; https://doi.org/10.1186/s12864-019-6414-6
4	Alternaria alternata	JS-0527	1	Endophyte	Gai et al., 2021; https://doi.org/10.1094/MPMI-10-20-0278-SC
5	Alternaria alternata	NAP07	1	Necrotroph	Gai et al., 2021; https://doi.org/10.1094/MPMI-10-20-0278-SC
6	Alternaria alternata	JS-1623	1	Endophyte	Park et al., 2020; https://doi.org/10.1080/12298093.2020.1756134
7	Alternaria alternata	FERA 1177	2	Necrotroph	Armitage et al., 2019; https://doi.org/10.3389/fmicb.2019.03124
8	Alternaria alternata	Z7	2	Necrotroph	Wang et al., 2019; https://doi.org/10.1111/mpp.12848
9	Alternaria alternata	ATCC 34957	2	Saprophyte	Nguyen et al., 2016; https://doi.org/10.1128/genomeA.01554-15
10	Alternaria arborescens	FERA 675	2	Saprophyte	Armitage et al., 2019; https://doi.org/10.3389/fmicb.2019.03124
11	Alternaria arborescens	RGR 97.0013	2	Saprophyte	Armitage et al., 2019; https://doi.org/10.3389/fmicb.2019.03124
12	Alternaria brassicae	J3	2	Necrotroph	Rajarammohan et al., 2019; https://doi.org/10.1094/MPMI-03-19-0084-A
13	Alternaria brassicicola	Abra43	2	Necrotroph	Belmas et al., 2018; https://doi.org/10.1128/genomeA.01559-17
14	Alternaria burnsii	CBS107.38	2	Saprophyte/minor pathogen	Paul et al., 2015; https://doi.org/10.5941/MYCO.2015.43.4.384
15	Alternaria consortialis	JCM 1940	-	minor pathogen/necrotroph	https://www.ncbi.nlm.nih.gov/bioproject/PRJDB3614
16	Alternaria gaisen	FERA 650	2	Necrotroph	Armitage et al., 2019; https://doi.org/10.3389/fmicb.2019.03124
17	Alternaria solani	NL03003	2	Necrotroph	Wolters et al., 2018; https://doi.org/10.1094/MPMI-12-17-0309-A
18	Alternaria tenuissima	FERA 1166	2	Necrotroph	Armitage et al., 2019; https://doi.org/10.3389/fmicb.2019.03124
19	Alternaria tenuissima	FERA 648	2	Saprophyte	Armitage et al., 2019; https://doi.org/10.3389/fmicb.2019.03124
20	Alternaria tenuissima	FERA 1164	2	Saprophyte	Armitage et al., 2019; https://doi.org/10.3389/fmicb.2019.03124
21	Alternaria tenuissima	FERA 743	2	Necrotroph	Armitage et al., 2019; https://doi.org/10.3389/fmicb.2019.03124
22	Alternaria tenuissima	FERA 1082	2	Saprophyte	Armitage et al., 2019; https://doi.org/10.3389/fmicb.2019.03124
23	Alternaria tenuissima	FERA 24350	2	Saprophyte	Armitage et al., 2019; https://doi.org/10.3389/fmicb.2019.03124
